# Supplementary material for: Ryanodine receptor dispersion disrupts Ca2+ release in failing cardiac myocytes
Source: eLife. 2018 Oct 30;7:e39427. doi: 10.7554/eLife.39427 (PMC6245731; doi:10.7554/eLife.39427)
Supplement: Figure 2—source data 1. — RyR cluster and CRU data were compared in Sham and HF myocytes, with data cumulated across cells or animals. Two CRU definitions were also compared, with maximum edge-to-edge distances of 150 nm or 100 nm. Significant differences within data cumulated across cells were determined by t-test, while data cumulated across animals were tested with linear mixed effects models (Lindstrom and Bates, 1988). [file elife-39427-fig2-data1.pdf]

**Figure 2-source data 1**

|            |                             | Cumulated Within Cells |                 |          | Cumulated Within Animals |                 |          |
|------------|-----------------------------|------------------------|-----------------|----------|--------------------------|-----------------|----------|
|            |                             | SHAM<br>(n=46)         | HF<br>(n=50)    | <i>P</i> | SHAM<br>(n=6 )           | HF<br>(n= 9)    | <i>P</i> |
| 150 nm CRU | Clusters / $\mu\text{m}^2$  | 4.5 $\pm$ 0.3          | 6.4 $\pm$ 0.3   | <0.001   | 4.3 $\pm$ 0.6            | 6.3 $\pm$ 0.5   | 0.011    |
|            | RyRs / Cluster              | 13.7 $\pm$ 0.7         | 9.1 $\pm$ 0.4   | <0.001   | 14.7 $\pm$ 1.8           | 9.1 $\pm$ 0.8   | 0.002    |
|            | RyRs / CRU                  | 34.1 $\pm$ 1.3         | 23.8 $\pm$ 0.9  | <0.001   | 34.3 $\pm$ 2.2           | 23.8 $\pm$ 1.5  | <0.001   |
|            | Clusters / CRU              | 3.7 $\pm$ 0.2          | 4.2 $\pm$ 0.2   | 0.049    | 3.1 $\pm$ 0.6            | 4.0 $\pm$ 0.4   | 0.175    |
|            | Inter-cluster distance (nm) | 203 $\pm$ 8            | 170 $\pm$ 5     | <0.001   | 215 $\pm$ 20             | 170 $\pm$ 10    | 0.031    |
|            | CRU solidity                | 0.57 $\pm$ 0.01        | 0.52 $\pm$ 0.01 | 0.017    | 0.59 $\pm$ 0.03          | 0.52 $\pm$ 0.02 | 0.105    |
| 100 nm CRU | RyRs / CRU                  | 26.2 $\pm$ 1.0         | 17.2 $\pm$ 0.7  | <0.001   | 26.4 $\pm$ 2.0           | 17.3 $\pm$ 1.3  | <0.001   |
|            | Clusters / CRU              | 2.8 $\pm$ 0.1          | 2.9 $\pm$ 0.1   | 0.393    | 2.6 $\pm$ 0.3            | 3.0 $\pm$ 0.2   | 0.343    |
|            | Inter-cluster distance (nm) | 215 $\pm$ 4            | 179 $\pm$ 6     | 0.002    | 228 $\pm$ 22             | 178 $\pm$ 12    | 0.028    |
|            | CRU solidity                | 0.63 $\pm$ 0.01        | 0.62 $\pm$ 0.01 | 0.365    | 0.66 $\pm$ 0.03          | 0.62 $\pm$ 0.02 | 0.301    |
