# Supplementary material for: Ryanodine receptor dispersion disrupts Ca2+ release in failing cardiac myocytes
Source: eLife journal article supplement (doi:10.7554/elife.39427), 2018-10-30

Figure 6-source data 1

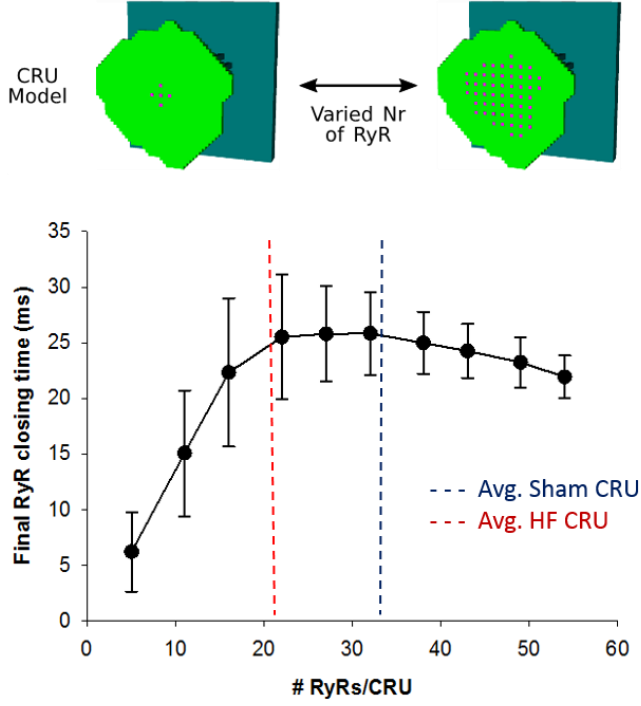

Supplement: supp [file elife-39427-supp-v1.zip]
