# Supplementary material for: Ryanodine receptor dispersion disrupts Ca2+ release in failing cardiac myocytes
Source: eLife journal article supplement (doi:10.7554/elife.39427), 2018-10-30
Supplement: supp [file elife-39427-supp-v1.zip]

**Figure 4-source data 1**

|                                        | 1 Cluster | 3 Clusters | 7 Clusters | 10 Clusters |
|----------------------------------------|-----------|------------|------------|-------------|
| # RyRs                                 | 54        | 42         | 61         | 70          |
| jSR volume ( $10^{-3} \mu\text{m}^3$ ) | 3.8       | 4.4        | 6.3        | 8.4         |
| jSR volume / # RyRs                    | 0.07      | 0.11       | 0.1        | 0.12        |
