# Supplementary material for: Ryanodine receptor dispersion disrupts Ca2+ release in failing cardiac myocytes
Source: eLife. 2018 Oct 30;7:e39427. doi: 10.7554/eLife.39427 (PMC6245731; doi:10.7554/eLife.39427)
Supplement: Supplementary file 2. [file elife-39427-supp2.docx]

**Supplementary file 2:**

|  | (ms-1) | (ms-1) | (µM) |  |
| --- | --- | --- | --- | --- |
| + | 5 x 10-6 | 0.7 | 80 | 2.8 |
| - | 0.9 | 3 | 62.5 | -0.5 |
