# Supplementary figures and images for: Ryanodine receptor dispersion disrupts Ca2+ release in failing cardiac myocytes
Source: eLife journal article supplement (doi:10.7554/elife.39427), 2018-10-30

Supplemental Figure 3.

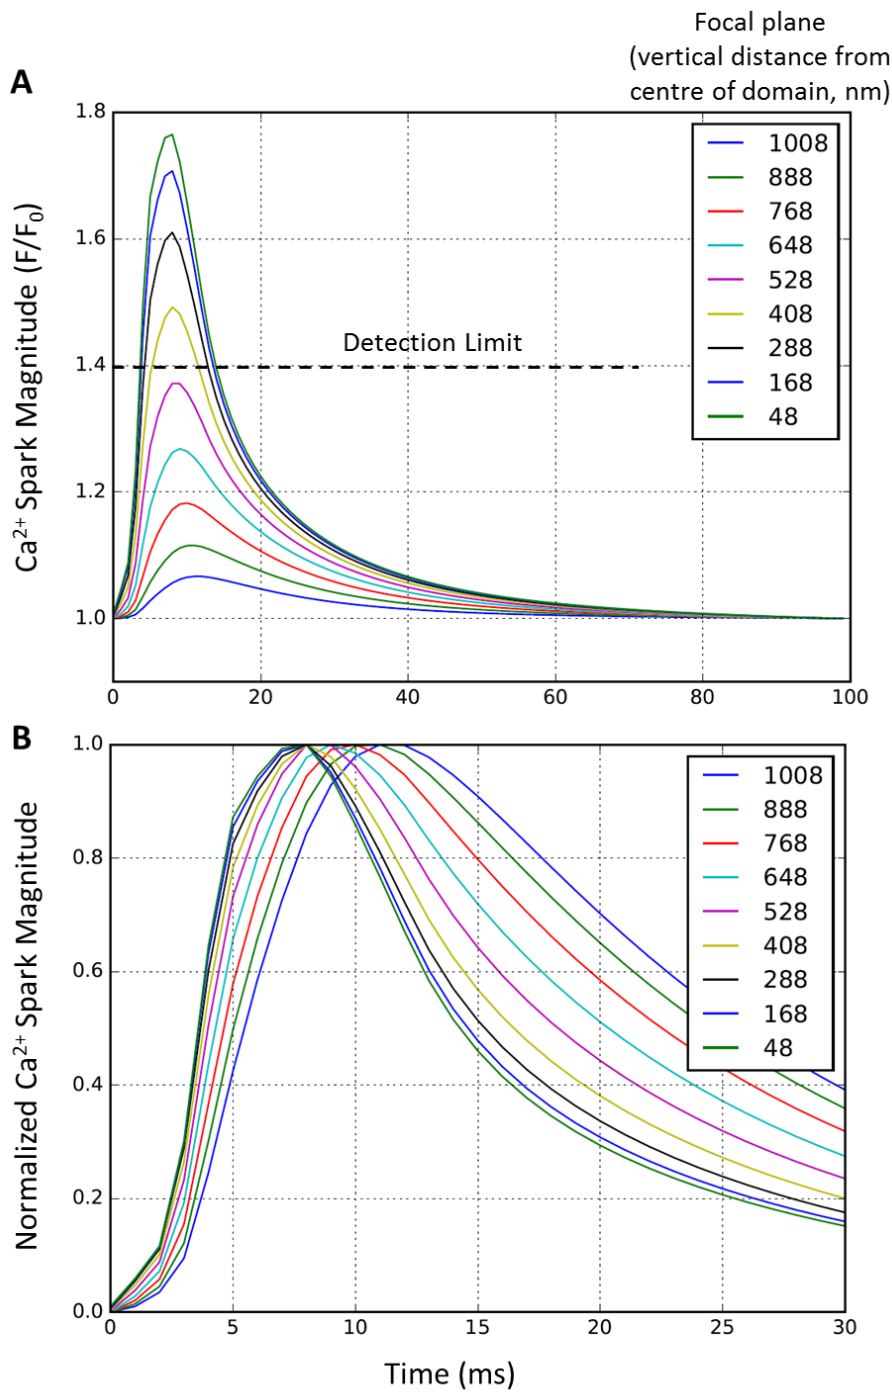

Supplement: supp [file elife-39427-supp-v1.zip]

Supplemental Figure 2.

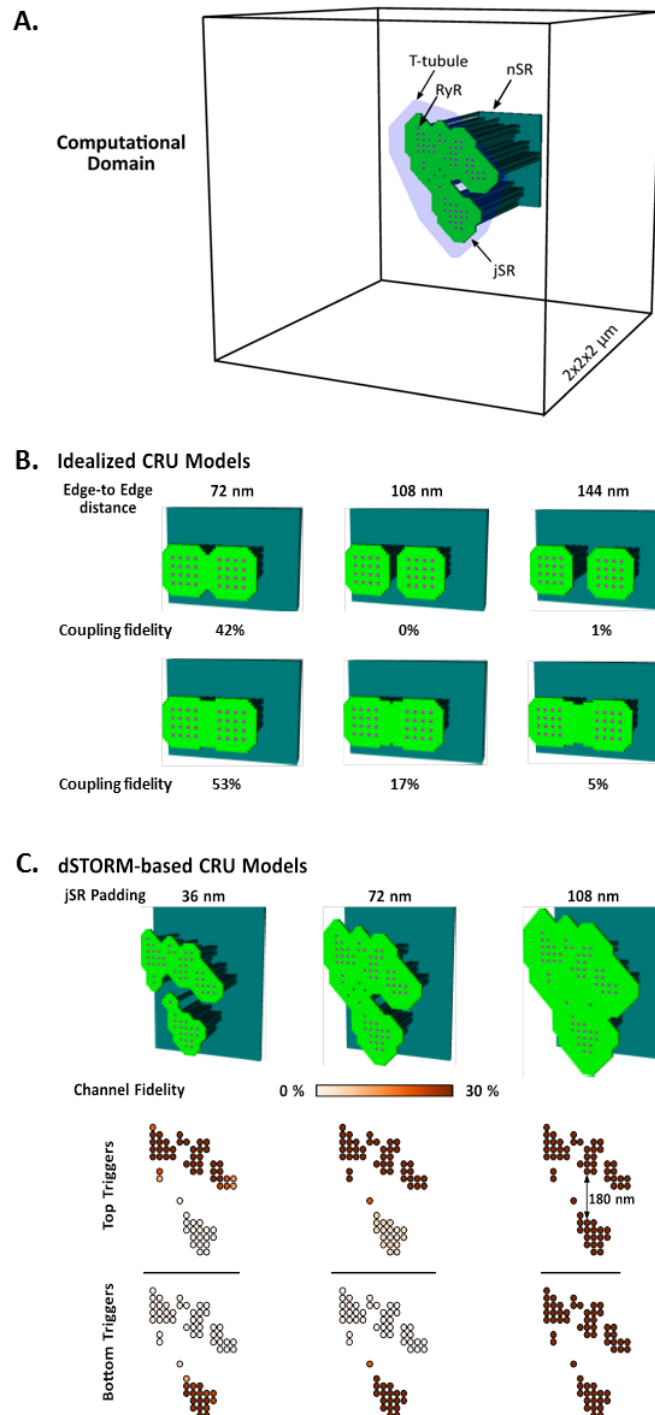

Supplement: supp [file elife-39427-supp-v1.zip]

Supplemental Figure 4

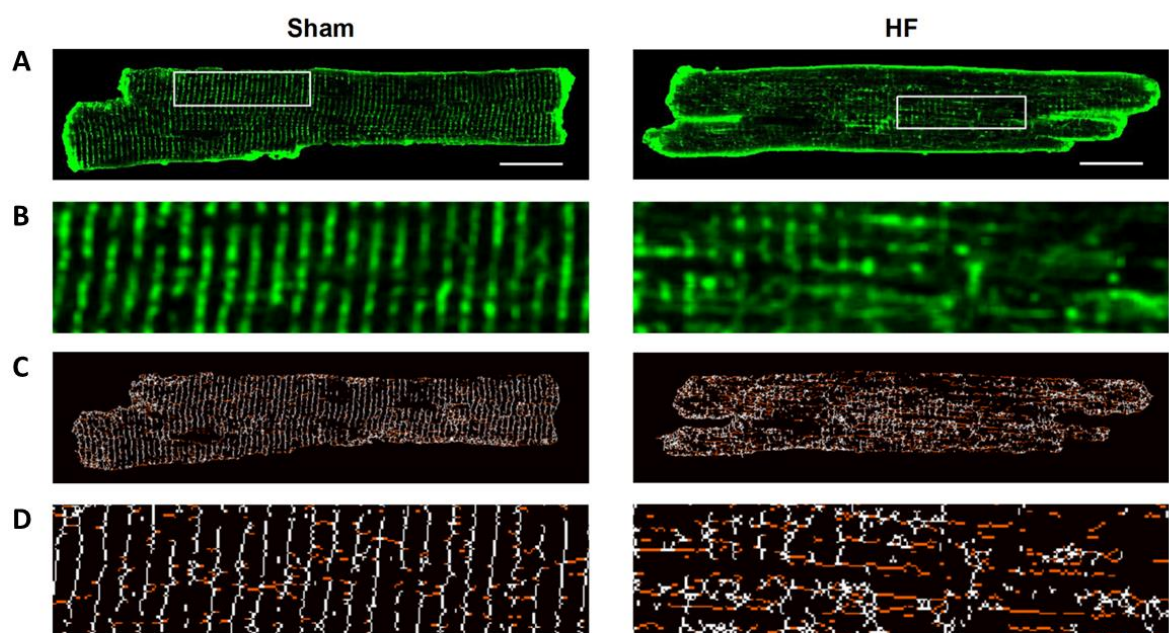

Supplement: supp [file elife-39427-supp-v1.zip]

Supplemental Figure 1.

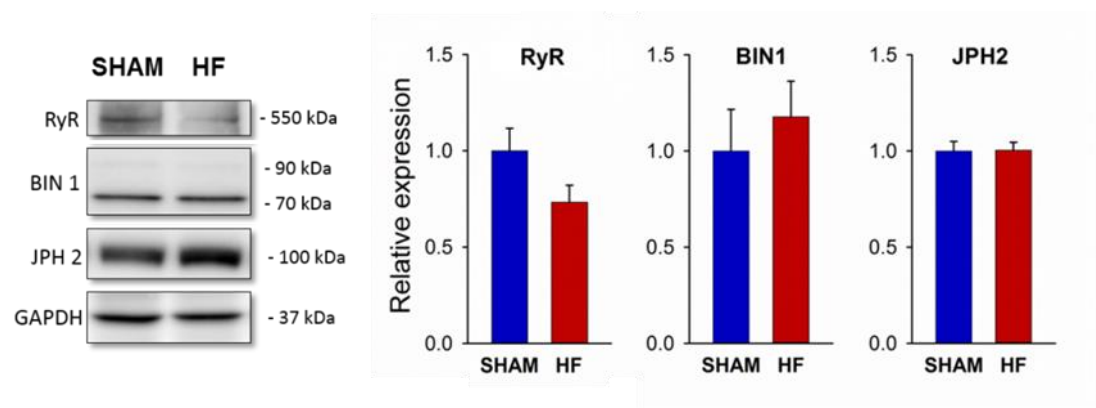

Supplement: supp [file elife-39427-supp-v1.zip]
